# Supplementary material for: Energy transfer processes in hyperfluorescent organic light-emitting diodes
Source: Royal Society of Chemistry journal article supplement (doi:10.1039/d1tc05090g), 2022-01-01
Supplement: d1tc05090g1.pdf [file d1tc05090g1.pdf]

# Supporting Information

## Energy transfer processes in hyperfluorescent organic light-emitting diodes

Eunkyung Cho,<sup>1</sup> Minki Hong,<sup>2</sup> Yu Seok Yang,<sup>3</sup> Yong Joo Cho,<sup>3</sup>  
Veaceslav Coropceanu,<sup>1\*</sup> and Jean-Luc Brédas<sup>1\*</sup>

<sup>1</sup> Department of Chemistry and Biochemistry  
The University of Arizona  
Tucson, Arizona 85721-0088

<sup>2</sup> Kyulux North America, Inc.  
50 Milk Street  
Boston, Massachusetts 02109

<sup>3</sup> Kyulux, Inc.  
4-1 Kyudai-Shinmachi, Nishi-ku  
Fukuoka, 819-0388, Japan

\* Email: [coropceanu@arizona.edu](mailto:coropceanu@arizona.edu); [jlbredas@arizona.edu](mailto:jlbredas@arizona.edu)

## Content

### Experimental details S3

**Figure S1.** Experimental absorption (dashed line) and emission (solid line) spectra of (a) TBRb, (b) 4CzIPN, and (c) mCBP thin films. S3

**Figure S2.** Radial distribution functions (RDFs) of (a) 4CzIPN-mCBP pairs, (b) 4CzIPN-4CzIPN pairs, and (c) mCBP-mCBP pairs in binary 4CzIPN:mCBP and ternary TBRb:4CzIPN:mCBP films as a function of intermolecular center-of-mass distance (R). S4

**Figure S3.** Normalized distributions of singlet (S, dashed line) and triplet (T, solid line) excited-state energies in mCBP, evaluated for molecules extracted from MD trajectories in the TBRb:4CzIPN:mCBP blend. S5

**Figure S4.** Normalized distributions of the energy differences  $\Delta E_{S_1T_1}$  in TBRb (a) and 4CzIPN (b); the energy differences  $\Delta E_{S_1T_2}$  in TBRb (c); and the SOC values between the  $S_1$  and  $T_1$  states in TBRb (d), evaluated for molecules extracted from MD trajectories in the TBRb:4CzIPN:mCBP blend. S6

## Experimental details

All chemicals were purchased from commercial sources and used with further purification. All thin-film samples were thermally evaporated under high vacuum pressure on quartz substrate. UV-visible absorption spectra of the thin films were performed with a Perkin-Elmer Lambda 950-PKA spectrometer in the range of 290-800 nm. The photoluminescence spectra of the thin films were measured with a FluoroMax-4 Horiba Jobin Yvon spectrofluorometer.

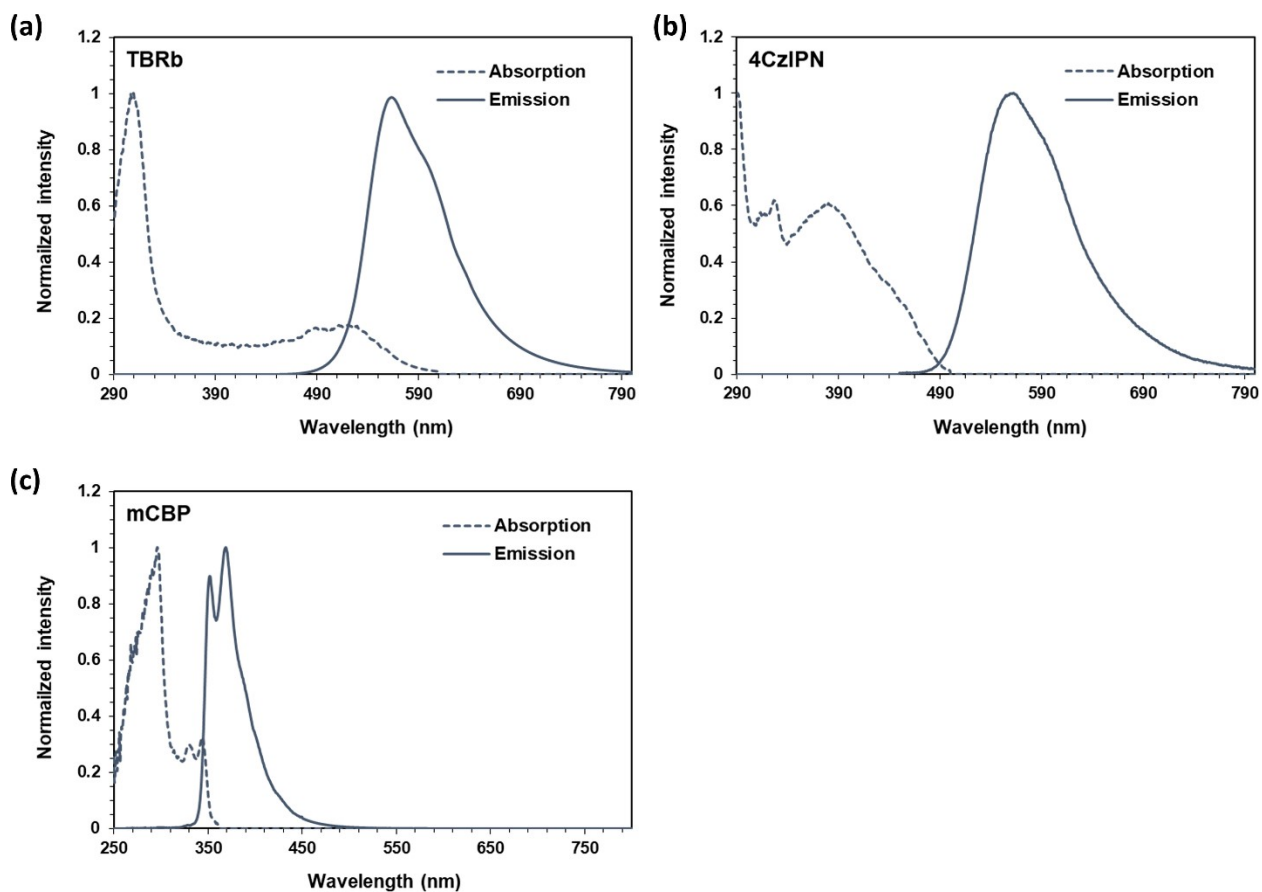

**Figure S1.** Experimental absorption (dashed line) and emission (solid line) spectra of (a) TBRb, (b) 4CzIPN, and (c) mCBP thin films.

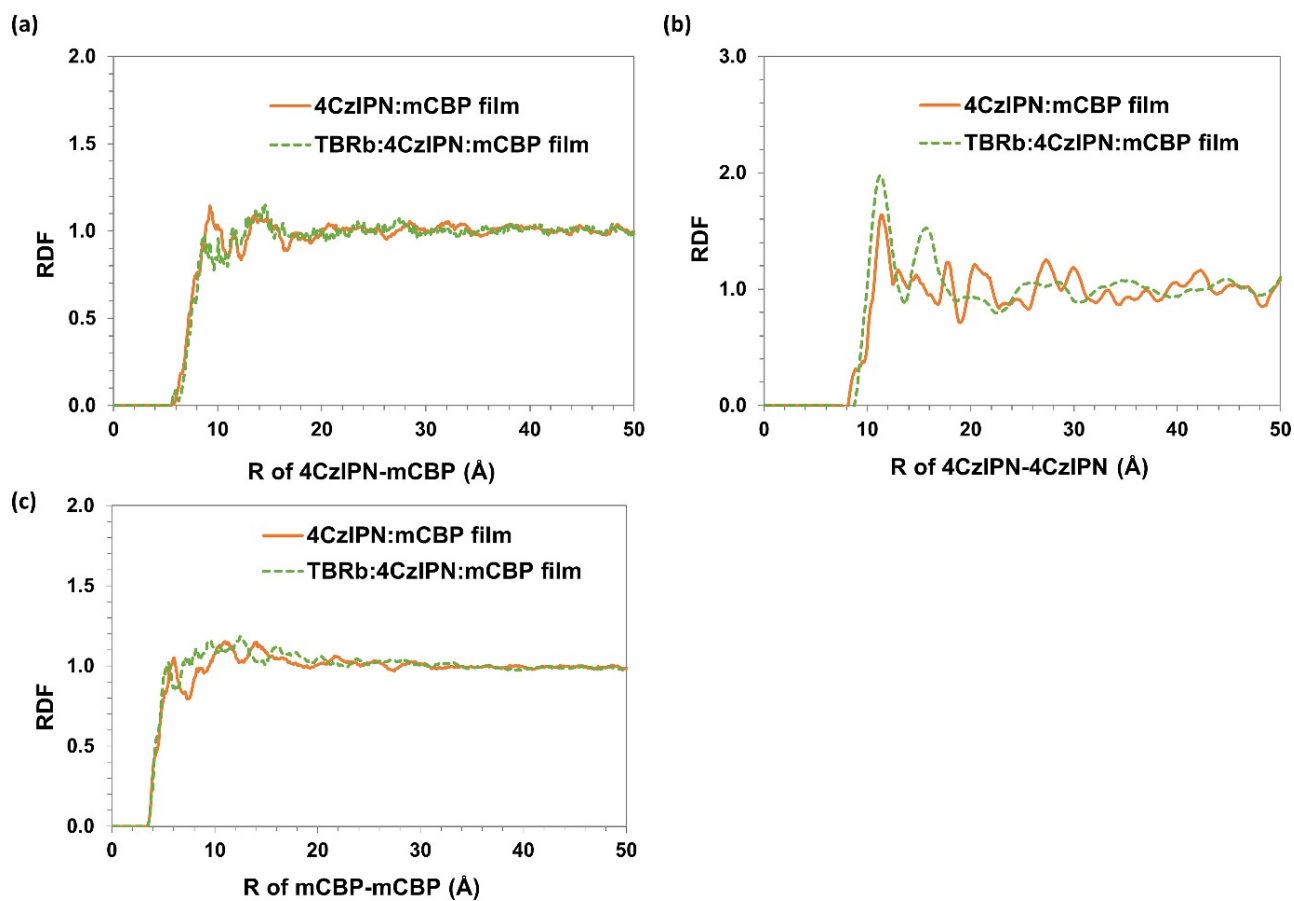

**Figure S2.** Radial distribution functions (RDFs) of (a) 4CzIPN-mCBP pairs, (b) 4CzIPN-4CzIPN pairs, and (c) mCBP-mCBP pairs in binary 4CzIPN:mCBP and ternary TBRb:4CzIPN:mCBP films as a function of intermolecular center-of-mass distance (R).

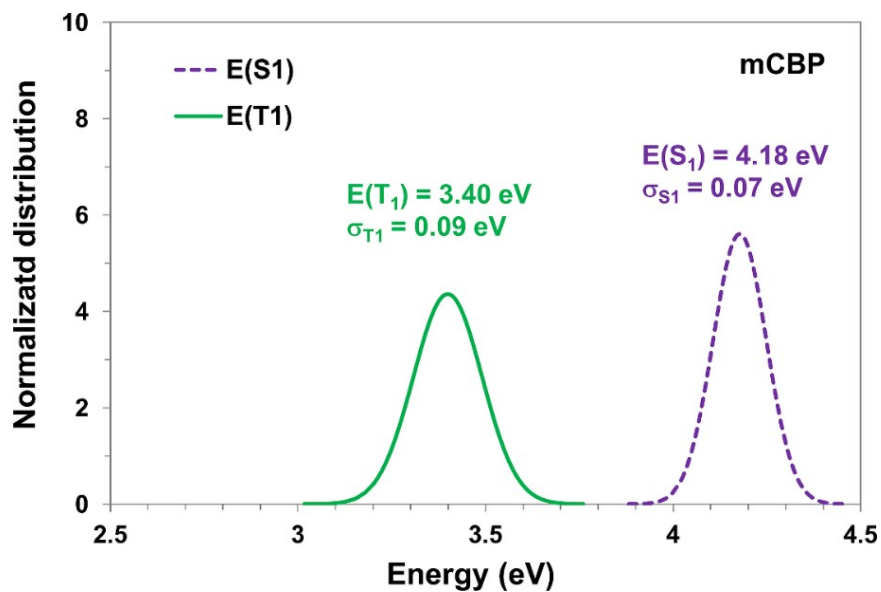

**Figure S3.** Normalized distributions of singlet (S, dashed line) and triplet (T, solid line) excited-state energies in mCBP, evaluated for molecules extracted from MD trajectories in the TBRb:4CzIPN:mCBP blend.

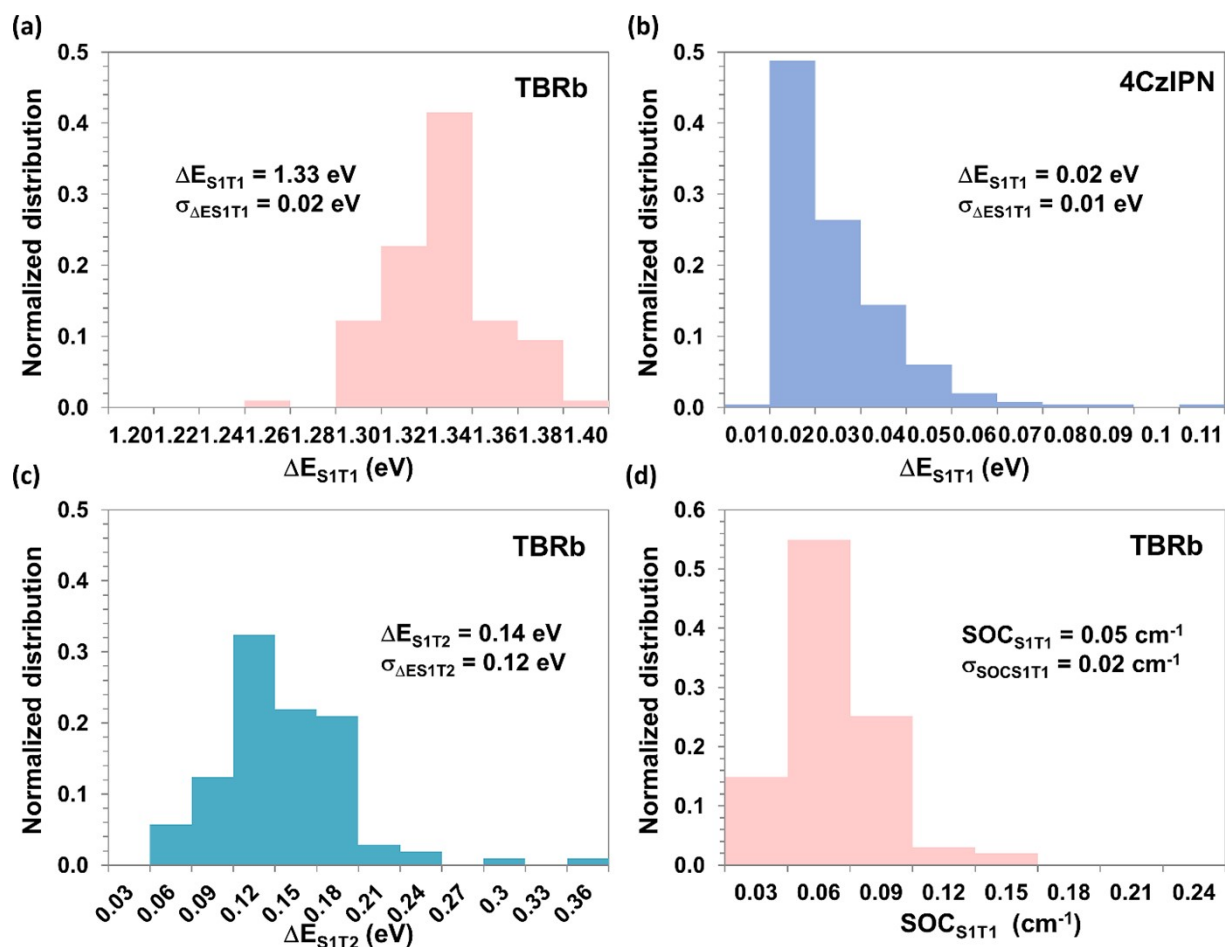

**Figure S4.** Normalized distributions of the energy differences  $\Delta E_{S1T1}$  in TBRb (a) and 4CzIPN (b); the energy differences  $\Delta E_{S1T2}$  in TBRb (c); and the SOC values between the  $S_1$  and  $T_1$  states in TBRb (d), evaluated for molecules extracted from MD trajectories in the TBRb:4CzIPN:mCBP blend.
